# Supplementary material for: Using Deep Learning To Uncover The Relation Between Age and Life Satisfaction
Source: Research Square preprint supplement (doi:10.21203/rs.3.rs-943521/v1), 2021-10-06
Supplement: Supplementary file 1 [file 0022a1663e32426e86c38f3d.docx]

**Proof of Proposition**

*Discrete case:*

We can easily prove the proposition also for the continuous case if we assume that the conditional joint density function exists.

*Continuous case:*
